# Supplementary material for: Exploring the structural determinants of selective phosphopeptide recognition using bivalent metal-coordination complexes
Source: Royal Society of Chemistry journal article supplement (doi:10.1039/c2md20342a), 2012-12-12
Supplement: c2md20342a.pdf [file c2md20342a.pdf]

# Exploring the structural determinants of selective phosphopeptide recognition using bivalent metal-coordination complexes

## Supporting Information

Dziyana Kraskouskaya<sup>a†</sup>, Joel A. Drewry<sup>a†</sup>, Eugenia Duodu<sup>a†</sup>, Steven Burger<sup>b</sup>, James Eaton, Andrés Cisneros<sup>b</sup> and Patrick T. Gunning<sup>a\*</sup>

*University of Toronto, Department of Chemistry, Department of Chemical and Physical Sciences  
3359 Mississauga Road North, Mississauga, ON, L5L 1C6 Canada.  
Tel: 905-569-4588, E-mail: patrick.gunning@utoronto.ca*

## Experimental

### General Methods

Anhydrous solvents methanol, DMSO, DCM, THF and DMF were purchased from Sigma Aldrich and used directly from Sure-Seal bottles. Molecular sieves were activated by heating to 300 °C under vacuum overnight. All reactions were performed under an atmosphere of dry nitrogen in oven-dried glassware and were monitored for completeness by thin-layer chromatography (TLC) using silica gel (visualized by UV light, or developed by treatment with KMnO<sub>4</sub> stain or phosphomolybdic acid stain). <sup>1</sup>H and <sup>13</sup>C NMR spectra were recorded on Bruker 400 MHz and a Varian 500 MHz spectrometers in either CDCl<sub>3</sub>, CD<sub>3</sub>OD or D<sub>6</sub>-DMSO. Chemical shifts (δ) are reported in parts per million after calibration to residual isotopic solvent. Coupling constants (*J*) are reported in Hz. Before biophysical testing, inhibitors were subjected to further purification by reversed-phase HPLC (rpHPLC). Analysis and purification by rpHPLC were performed using either Atlantis Prep T3 10 μm C18 (2) 250.0 x 19.0 mm column run at 20.00 mL/min (preparative) or a Microsorb-MV 300 A C18 250.0 mm x 4.6 mm column run at 1.00 mL/min (analytical), using gradient mixtures of (A) water with 0.1% TFA and (B) 10:1 acetonitrile/water with 0.1% TFA. Ligand purity was confirmed by analytical rpHPLC using

linear gradients from 100% A to 100% B, with changing solvent composition of either (I) 4.5% or (II) 1.5% per min after an initial 2 min of 100% A.

### **Computational Modeling of Zn(II)-BDPA Receptors**

All computational modeling was performed by Dr. Steven Burger (Wayne State University). The simulation was done with the AMBER11 (<http://www.citeulike.org/user/bmduggan/article/5692441>) software. The bonded parameters for the Zn scaffold were obtained by using the para\_freq program (<http://pubs.acs.org/doi/abs/10.1021/ct2007742>). Charges for the FAM and the Zn scaffold were obtained by restrained electrostatic potential (RESP) fitting using the density from a HF/6-31G\* optimized structure. AMBERTOOLS 11 was used to do the RESP fitting and to assign GAFF parameters for the system. The two polypeptide strands were built and solvated in an explicit TIP3P water box. An initial 1ns equilibration phase was run with a 2.0 kcal/mol/Å restraint on the distance between the N on the derivative group and the delta carbon on the glutamate. The constraint was removed and a further 5ns molecular dynamics was performed with a NPT ensemble at 298 K using a Langevin thermostat.

### **Determination of Receptor:Phosphopeptide Binding Constants via a Fluorescence Intensity Assay**

Fluorescence intensity screens were conducted as previously described using Corning Black 384 well plates in a Tecan M1000 fluorometer with plate reader. Each well (of a 96 well plate) contained 10.0 nM phosphopeptide in 50.00 mM HEPES buffer (pH 7.3, 25°C) and a variable concentration of receptor (1.0 nM to 100 μM). Z-depth and gain were both cell-optimized by the

system automatically. Concentrations exceeding 100  $\mu\text{M}$  were not used in order to avoid fluorescence quenching due to collisional non-binding events. Each receptor was screened in triplicate, with data averaged to ensure accurate  $K_d$  values. Binding constants were obtained using non-linear logistic fitting in Origin 8.

**Table S1:** Receptor binding affinities ( $K_a \text{ M}^{-1}$ ) across the six Fam-G-labelled peptides

| Receptor | pSGEGG  | Error  | pSGGEG  | Error  | pSGRGG  | Error  |
|----------|---------|--------|---------|--------|---------|--------|
| 1        | 92964   | 6371   | 109705  | 14434  | 24098   | 3370   |
| 2        | 171851  | 24107  | 80426   | 18806  | 42585   | 8751   |
| 3        | 1325190 | 119768 | 927859  | 95640  | 407113  | 30740  |
| 4        | 825621  | 41990  | 1110350 | 205112 | 540503  | 54908  |
| 5        | 530650  | 69581  | 630847  | 60093  | 109467  | 14564  |
| 6        | 3217190 | 309061 | 3762510 | 337491 | 949821  | 182056 |
| 7        | 3190710 | 89895  | 3137550 | 273276 | 1618670 | 94140  |

  

| Receptor | pSGGRG  | Error  | pSGIGG  | Error  | pSGGIG  | Error  |
|----------|---------|--------|---------|--------|---------|--------|
| 1        | 11904   | 2978   | 106720  | 25455  | 104943  | 15646  |
| 2        | 50642   | 10397  | 91236   | 7612   | 54099   | 6895   |
| 3        | 477733  | 71456  | 1019320 | 96233  | 670637  | 143355 |
| 4        | 398259  | 23324  |         |        | 737278  | 205799 |
| 5        | 154206  | 13689  | 1088730 | 159866 | 630847  | 60093  |
| 6        | 755692  | 130798 | 660899  | 168399 | 2641100 | 273924 |
| 7        | 1117780 | 113786 | 2299960 | 294273 | 2064750 | 185193 |

**Table S2:** Receptor binding affinities ( $K_a \text{ M}^{-1}$ ) across the three Fam-G-labeled peptides

| Receptor | pSDDDD   | error    | pSDLDL   | error    | pSRLRL   | error    |
|----------|----------|----------|----------|----------|----------|----------|
| 1        | 1.05E+06 | 2.47E+04 | 1.57E+06 | 5.33E+05 | 8.35E+05 | 2.07E+05 |
| 2        | 2.44E+06 | 2.69E+05 | 1.55E+06 | 1.93E+05 | 7.56E+05 | 9.00E+04 |
| 3        | 2.52E+06 | 4.22E+05 | 5.40E+06 | 1.78E+06 | 1.67E+06 | 1.13E+05 |
| 4        | 1.88E+06 | 1.64E+05 | 3.06E+06 | 7.16E+05 | 1.23E+06 | 1.88E+05 |
| 5        | 1.18E+07 | 2.61E+06 | 1.01E+07 | 1.85E+06 | 2.33E+06 | 8.34E+05 |
| 6        | 8.66E+06 | 3.10E+06 | 5.47E+06 | 2.22E+06 | 3.20E+06 | 6.69E+05 |
| 7        | 2.61E+07 | 6.64E+06 | 1.17E+07 | 3.24E+06 | 6.33E+06 | 8.22E+05 |

### Isothermal Titration Calorimetry (ITC) Experiments

ITC experiments were used to measure the binding of the metal complexes to various substrates, and were performed at 25.0 °C (298 K) using Microcal VP-ITC titration micro-calorimeter. In

order to minimize mixing heat effects caused by differences in solution composition, the substrates and receptor were both dissolved in freshly prepared HEPES buffer ( $\pm 5.0\%$  DMSO) (50 mM, pH = 7.2) before each titration experiment. All solutions prior to experiments were degassed before being added to the calorimeter cell. The substrates, at a concentration of approximately 2 mM, were injected in 10  $\mu\text{L}$  increments into the reaction cell (cell volume 1.5 mL) containing complex at a concentration of *ca* 0.10 mM, until there occurred a saturation of binding sites. A 250  $\mu\text{L}$  injection syringe with 310–400 rpm stirring was used to give a series of 10.0  $\mu\text{L}$  injections at 3.5-min intervals. Control experiments for heats of mixing and dilution were performed under identical conditions and used for data correction in subsequent analysis. Data acquisition and subsequent non-linear regression analysis were done in terms of a simple binding model using the Microcal ORIGIN software package.

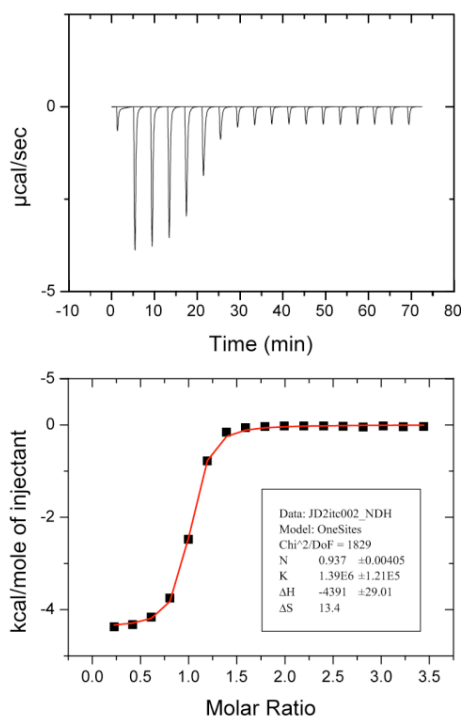

**Figure 1** ITC trace showing a high affinity stoichiometric binding between **7** and FAM-GpSGEGG ( $K_a = 1.39 \pm 0.12 \times 10^6 \text{ M}^{-1}$ ). This affinity constant is consistent with the value calculated from the fluorescence intensity assay ( $K_a = 3.50 \pm 0.11 \times 10^6 \text{ M}^{-1}$ ).

**Table S3:** Summary of thermodynamic parameters obtained by ITC experiments for receptors **5** and **7**.

|      | <b>K<sub>a</sub></b><br>(M <sup>-1</sup> , ITC) |                      | <b>K<sub>a</sub></b><br>(M <sup>-1</sup> , FI) |                      | <b>ΔH</b><br>(cal/mol) |       | <b>ΔS</b><br>(cal/mol K) |      |
|------|-------------------------------------------------|----------------------|------------------------------------------------|----------------------|------------------------|-------|--------------------------|------|
|      | 5                                               | 7                    | 5                                              | 7                    | 5                      | 7     | 5                        | 7    |
| GEGG | 8.36×10 <sup>5</sup>                            | 1.45×10 <sup>6</sup> | 5.31×10 <sup>5</sup>                           | 3.19×10 <sup>6</sup> | -2973                  | -4901 | 17.1                     | 11.8 |
| GRGG | 1.59×10 <sup>4</sup>                            | 3.16×10 <sup>5</sup> | 1.09×10 <sup>5</sup>                           | 1.62×10 <sup>6</sup> | -1241                  | -2028 | 15.1                     | 18.4 |
| DLDL | 3.90×10 <sup>6</sup>                            | -                    | 1.01×10 <sup>7</sup>                           | -                    | -2193                  | -     | 22.8                     | -    |
| DDDD | 1.25×10 <sup>7</sup>                            | -                    | 1.18×10 <sup>7</sup>                           | -                    | -2865                  | -     | 22.9                     | -    |

## Synthesis and Characterization

### Synthesis of ligands with O-coupled R-substituents

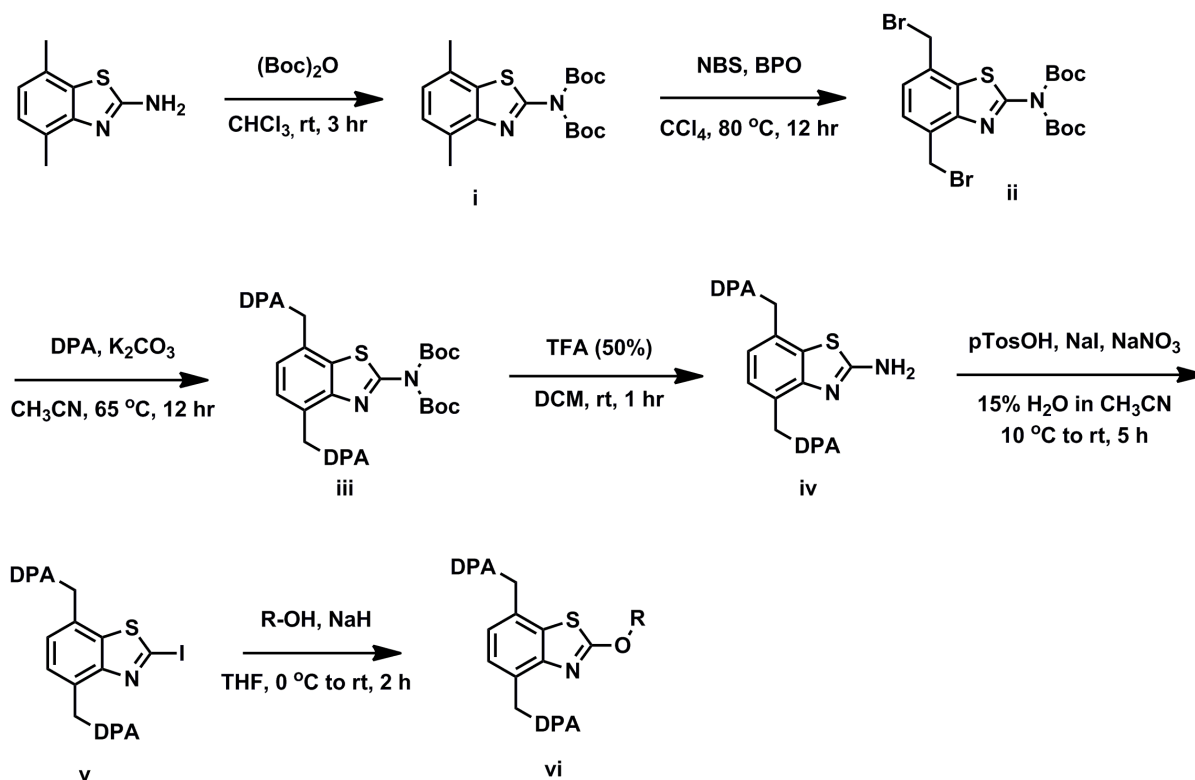

**Scheme 1.** Synthesis of O-coupled phosphopeptide receptors

### Scheme 1.

**Compound i.** 4,7-dimethylbenzo[d]thiazol-2-amine (2.50 g, 14.00 mmol, 1.0 eq) was dissolved in DCM (140.0 mL) and stirred at 0 °C for 3 h in the presence of Boc anhydride (6.72 g, 30.80 mmol, 2.2 eq), NMM (3.70 mL, 33.60 mmol, 2.4 eq) and catalytic DMAP. The solution was then diluted via the addition of DCM, and washed twice with water. Following drying and concentration *in vacuo*, the product was purified by flash chromatography (5:1 hexanes:EtOAc), to furnish **i** (4.70 g, 89 %):  $\delta_{\text{H}}$  (400 MHz,  $\text{CDCl}_3$ ) 1.59 (s, 18H,  $-\text{C}(\text{CH}_3)_3$ ), 2.48 (s, 3H,  $-\text{CH}_3$ ), 2.57 (s, 3H,  $-\text{CH}_3$ ), 6.99 (d,  $J = 7.7$  Hz, 1H, CH(Ar)), 7.13 (d,  $J = 7.7$  Hz, 1H, CH(Ar));  $\delta_{\text{C}}$  (100 MHz,  $\text{CDCl}_3$ ) 17.5, 20.5, 84.6, 124.2, 126.5, 128.3, 128.8, 133.1, 148.1, 149.4, 156.3; LRMS (ES+)  $m/z$  calculated for  $\text{C}_{19}\text{H}_{27}\text{N}_2\text{O}_4\text{S} = [\text{M}+\text{H}] 379.2$ . Found 379.2.

**Compound ii.** **i** (1.92 g, 5.1 mmol, 1.0 eq), NBS (2.30 g, 11.7 mmol, 2.3 eq) and catalytic BPO were dissolved in anhydrous carbon tetrachloride (50.0 mL), and refluxed under nitrogen overnight, after which TLC confirmed that the reaction had gone to completion. The product was diluted with DCM and washed several times with saturated sodium bicarbonate solution. Following drying and concentration *in vacuo*, the product was purified by flash chromatography (9:1 hexanes:EtOAc), to furnish **ii** (1.52 g, 55 %):  $\delta_{\text{H}}$  (400 MHz,  $\text{CDCl}_3$ ) 1.62 (s, 18H,  $-\text{C}(\text{CH}_3)_3$ ), 4.64 (s, 2H,  $-\text{CH}_2\text{Br}$ ), 4.89 (s, 2H,  $-\text{CH}_2\text{Br}$ ), 7.24 (d,  $J = 7.8$  Hz, 1H, CH (Ar)), 7.43 (d,  $J = 7.8$  Hz, 1H, CH (Ar))  $\delta_{\text{C}}$  (400 MHz,  $\text{CDCl}_3$ ) 27.6, 29.0, 31.6, 85.6, 124.5, 127.1, 130.1, 131.3, 132.8, 148.2, 149.0, 158.1; LRMS (ES+)  $m/z$  calculated for  $\text{C}_{19}\text{H}_{25}\text{Br}_2\text{N}_2\text{O}_4\text{S} [\text{M}+\text{H}] 534.98$ . Found 535.0

**N,N'-((2-aminobenzo[d]thiazole-4,7-diyl)bis(methylene))bis(1-(pyridin-2-yl)-N-(pyridin-2-ylmethyl)methanamine) (Compound iv).** **ii** (1.00 g, 1.9 mmol, 1.0 eq), 2,2-dipicolylamine (726  $\mu\text{L}$ , 4.0 mmol, 2.1 eq) and  $\text{K}_2\text{CO}_3$  (0.80 g, 5.8 mmol, 3.0 eq) were dissolved in anhydrous

acetonitrile (20 mL). The solution was then heated in a microwave vial to 100 °C for a period of 23 min, after which TLC confirmed the reaction had gone to completion. The product was extracted several times into DCM from saturated sodium bicarbonate solution, after which the organic fraction was dried and concentrated in vacuo to yield a crude oily solid (**iii**). The crude was then taken up in 50.0 % (v/v) TFA in DCM, and stirred at room temperature for 1.0 h to deprotect the 2'-amino group, followed by removal of solvent in vacuo. Purification was carried out using flash chromatography (92% dichloromethane/7% methanol/1% NH<sub>4</sub>OH, gradient), to furnish **iv** (0.66 g, 60 %):  $\delta_{\text{H}}$  (400 MHz, MeOD) 3.79 (s, 2H, PhCH<sub>2</sub>N-), 3.98 (s, 2H, PhCH<sub>2</sub>N-), 4.22 (s, 4H, -NCH<sub>2</sub>Pyr), 4.39 (s, 4H, -NCH<sub>2</sub>Pyr), 7.01 (d,  $J = 7.7$  Hz, 1H, CH(Ar)), 7.15 (d,  $J = 7.7$  Hz, 1H, CH(Ar)), 7.66-7.76 (m, 4H, CH(Pyrr)), 7.79 (t,  $J = 6.6$  Hz, 2H, CH(Pyrr)), 7.91 (d,  $J = 8.3$  Hz, 2H, CH(Pyrr)), 8.22 (t,  $J = 7.7$  Hz, 2H, CH(Pyrr)), 8.34 (t,  $J = 7.7$  Hz, 2H, CH(Pyrr)), 8.66 (d,  $J = 5.4$  Hz, 2H, CH(Pyrr)), 8.79 (d,  $J = 6.0$  Hz, 2H, CH(Pyrr));  $\delta_{\text{C}}$  (100 MHz, CDCl<sub>3</sub>) 56.7, 57.0, 57.1, 58.2, 114.3, 117.2, 123.8, 124.1, 124.8, 125.3, 125.7, 126.2, 128.5, 130.9, 141.2, 142.3, 144.4, 144.7, 153.1, 153.5, 169.5; LRMS (ES<sup>+</sup>)  $m/z$  calculated for C<sub>43</sub>H<sub>49</sub>N<sub>8</sub>O<sub>4</sub> [M+H] 773.35. Found 773.4.

**N,N'-((2-iodobenzo[d]thiazole-4,7-diyl)bis(methylene))bis(1-(pyridin-2-yl)-N-(pyridin-2-ylmethyl)methanamine) (Compound v).** **iv** (1.70 g, 3.0 mmol, 1.0 eq) and *p*-toluene sulfonic acid (2.88 g, 15.0 mmol, 5.0 eq) were dissolved in 15 % H<sub>2</sub>O in acetonitrile (10 mL) at 15.0 °C, after which NaNO<sub>3</sub> (0.42 g, 6.0 mmol, 2.0 eq) and NaI (1.00 g, 6.8 mmol, 2.3 eq) were added in one portion. The solution was then allowed to warm passively to room temperature. When the reaction was judged complete by TLC (~8 h), 0.35 g of sodium bisulfite was added to the solution. The solution was subsequently diluted with water and the product was extracted several times into dry ether. The organic layers were combined, dried and concentrated *in vacuo*. The

product **v** (1.02 g, 50 %) was isolated as an off-white powder after columning in a flat gradient of 92% dichloromethane/7% methanol/1% NH<sub>4</sub>OH.  $\delta_{\text{H}}$  (400 MHz, CDCl<sub>3</sub>) 3.80 (s, 4H, -NCH<sub>2</sub>Pyr), 3.86 (s, 2H, PhCH<sub>2</sub>N-), 3.89 (s, 4H, -NCH<sub>2</sub>Pyr), 4.23 (s, 2H, PhCH<sub>2</sub>N-), 7.10 (t,  $J = 6.0$  Hz, 2H, CH(Ar)), 7.14 (t,  $J = 5.6$  Hz, 2H, CH(Pyr)), 7.49 (d,  $J = 8.2$  Hz, 2H, CH(Pyr)) 7.57-7.71 (m, 8H, CH(Pyr)), 8.49 (d,  $J = 4.3$  Hz, 2H, CH(Pyr)), 8.52 (d,  $J = 5.2$  Hz, 2H, CH(Pyr));  $\delta_{\text{C}}$  (100 MHz, CDCl<sub>3</sub>) 54.2, 57.9, 60.2, 121.8, 122.0, 122.6, 123.6, 125.5, 126.3, 131.3, 136.2, 136.3, 137.6, 148.8, 148.9, 153.6, 158.2; LRMS (ES+)  $m/z$  calculated for C<sub>33</sub>H<sub>31</sub>N<sub>7</sub>S [M+H] 684.14. Found 684.2.

**Final O-coupled ligands (Scheme 1) – Representative synthesis – Ligand 3.** **v** (50.0 mg, 0.07 mmol, 1.0 eq) and was dissolved in 0.50 mL THF, and cooled over ice. In a second flask, phenol (16.0  $\mu$ L, 0.14 mmol, 2.0 eq) was reacted with stoichiometric NaH (5.8 mg, 0.14 mmol, 2.0 eq) in 0.30 mL THF at room temperature for 5 min. The solution containing the alkoxide was then added in one portion to the solution containing **v**, and the reaction was monitored for 2 h by TLC. When the reaction was complete, the product was extracted into EtOAc and the combined organic fractions were washed with water. After drying and concentrating *in vacuo*, the crude product was purified by rpHPLC to furnish the final ligand **L3** in high yield (42.0 mg, 92 %)  $\delta_{\text{H}}$  (400 MHz, CDCl<sub>3</sub>) 3.64-4.70 (m, 12H, PhCH<sub>2</sub>N- and -NCH<sub>2</sub>Pyr), 7.09-7.19 (m, 4H, CH (Ar)), 7.21 (d,  $J = 8.0$  Hz, 1H, CH (Ar)), 7.28-7.52 (m, 8H, CH (Ar)), 7.56-7.69 (m, 6H, CH (Ar)), 7.42-7.54 (m, 4H, CH (Ar));  $\delta_{\text{C}}$  (100 MHz, CDCl<sub>3</sub>) 54.3, 58.6, 60.2, 60.3, 121.9, 121.3, 121.3, 122.4, 123.0, 125.7, 130.6, 136.0, 136.2, 148.8, 158.9, 160.1, 167.3; HRMS (ES+)  $m/z$  calcd for C<sub>39</sub>H<sub>37</sub>N<sub>7</sub>OS [M+2H] 325.6384. Found 325.6379.



### Synthesis of ligands with N-coupled substituents

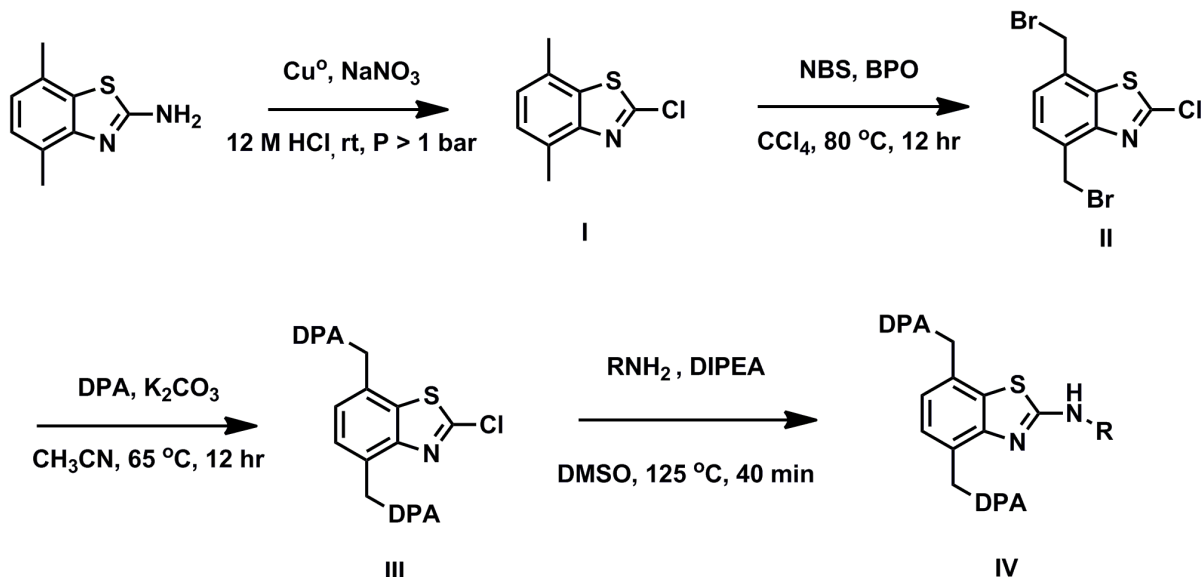

#### Scheme 2.

**2-chloro-4,7-dimethylbenzo[d]thiazole (Compound I).** 4,7-dimethylbenzo[d]thiazol-2-amine (2.00 g, 11.40 mmol, 1.0 eq) was dissolved in concentrated hydrochloric acid (27.00 mL) and cooled to at 0 °C using an ice bath. To this solution, elemental copper (0.6 g, 9.00 mmol, 0.8 eq) was added in one portion. Large quantities of  $\text{NaNO}_3$  were then added (in excess of 20.0 eq) in ~ 1.00 g portions, between which the reaction vessel was sealed using a rubber septum and hand strength. Significant pressures of noxious brown gas built up during this reaction. After the reaction was judged complete by TLC, the solution was neutralized using 1.0 M NaOH and the product was extracted several times into EtOAc. Following drying and concentration of the organic fractions *in vacuo*, the product was purified by flash chromatography on an extra-large column setup (8:1 hexanes:EtOAc), to furnish **I** (1.89 g, 85 %):  $\delta_{\text{H}}$  (400 MHz,  $\text{CDCl}_3$ ) 2.43 (s, 3H,  $-\text{CH}_3$ ), 2.66 (s, 3H,  $-\text{CH}_3$ ), 7.06 (d,  $J = 7.5$  Hz, 1H, CH(Ar)), 7.16 (d,  $J = 7.5$  Hz, 1H, CH(Ar));  $\delta_{\text{C}}$  (100 MHz,  $\text{CDCl}_3$ ) 17.9, 20.9, 125.9, 127.4, 128.4, 130.1, 136.5, 150.0, 151.5; LRMS (ES<sup>+</sup>)  $m/z$  calculated for  $\text{C}_9\text{H}_9\text{ClNS}$  [M+H] 198.01. Found 198.1.

**4,7-bis(bromomethyl)-2-chlorobenzo[d]thiazole (Compound II).** **I** (1.89 g, 9.5 mmol, 1.0 eq), NBS (3.52 g, 19.8 mmol, 2.1 eq) and catalytic BPO were dissolved in anhydrous carbon tetrachloride (94.0 mL), and refluxed under nitrogen overnight, after which TLC confirmed that the reaction had gone to completion. The product was diluted with DCM and washed several times with saturated sodium bicarbonate solution. Following drying and concentration *in vacuo*, the product was purified by flash chromatography (9:1 hexanes:EtOAc), to furnish **II** (1.30 g, 40 %):  $\delta_{\text{H}}$  (400 MHz,  $\text{CDCl}_3$ ) 4.6 (s, 2H,  $-\text{CH}_2\text{Br}$ ), 4.94 (s, 2H,  $-\text{CH}_2\text{Br}$ ), 7.40 (d,  $J = 7.7$  Hz, 1H, CH(Ar)), 7.52 (d,  $J = 7.7$  Hz, 1H, CH(Ar));  $\delta_{\text{C}}$  (100 MHz,  $\text{CDCl}_3$ ) 28.3, 32.1, 126.2, 128.0, 131.2, 132.4, 141.1, 154.1, 170.1; HRMS (ES+)  $m/z$  calculated for  $\text{C}_9\text{H}_7\text{Br}_2\text{ClNS}$  [M+H] 353.83590. Found 353.83545

***N,N'*-((2-chlorobenzo[d]thiazole-4,7-diyl)bis(methylene))bis(1-(pyridin-2-yl)-*N*-(pyridin-2-ylmethyl)methanamine) (Compound III).** **II** (0.26 g, 0.7 mmol, 1.0 eq), 2,2-dipicolylamine (278  $\mu\text{L}$ , 1.5 mmol, 2.1 eq) and  $\text{K}_2\text{CO}_3$  (0.31 g, 2.2 mmol, 3.0 eq) were dissolved in anhydrous acetonitrile (20 mL). The solution was then heated in a microwave vial to 100 °C for a period of 23 min, after which TLC confirmed the reaction had gone to completion. The product was extracted several times into DCM from saturated sodium bicarbonate solution, after which the organic fraction was dried and concentrated *in vacuo* to yield a crude oily solid. Purification was carried out using silica gel chromatography on a large column (92% dichloromethane/7% methanol/1%  $\text{NH}_4\text{OH}$ , gradient), to furnish **III** (0.31 g, 71 %) in reasonable yield:  $\delta_{\text{H}}$  (400 MHz,  $\text{CDCl}_3$ ) 3.70 (s, 4H,  $-\text{NCH}_2\text{Pyr}$ ), 3.77 (s, 2H,  $\text{PhCH}_2\text{N}-$ ), 3.78 (s, 4H,  $-\text{NCH}_2\text{Pyr}$ ), 4.10 (s, 2H,  $\text{PhCH}_2\text{N}-$ ), 6.90-7.05 (m, 4H, CH(Ar)), 7.18 (d,  $J = 7.3$  Hz, 1H, CH(Ar)), 7.38 (d,  $J = 8.1$  Hz, 2H, CH(Ar)), 7.44-7.58 (m, 7H, CH(Ar)), 8.31-8.42 (m, 4H, CH(Ar));  $\delta_{\text{C}}$  (100 MHz,  $\text{CDCl}_3$ ) 54.0, 57.7, 60.1, 121.8, 122.1, 122.7, 123.7, 124.5, 125.6, 126.4, 126.6, 131.6, 131.8, 134.4,

136.3, 136.4, 148.6, 148.8, 150.4, 154.1, 158.0, 159.3; HRMS (ES+) calculated for  $C_{33}H_{31}ClN_7S$  [M+H] 592.20502. Found 592.20384.

**Final N-coupled ligands (Scheme 2) – Representative synthesis – Ligand 5. III** (53.0 mg, 0.09 mmol, 1.0 eq), ethylene diamine (18  $\mu$ L, 0.27 mmol, 3.0 eq) and DIPEA (47  $\mu$ L, 0.27 mmol, 3.0 eq) were dissolved in 0.90 mL acetonitrile, and heated at 125 °C in a microwave vial for 90 min. The solvent was then removed *in vacuo* and the crude product was purified by rpHPLC, to yield **L5** in high purity (50.0 mg, 90 %).  $\delta_H$  (400 MHz,  $CDCl_3$ ) 2.01 (s, 2H,  $-NH_2$ ), 2.98 (t,  $J = 5.8$  Hz, 2H,  $-CH_2NH_2$ ), 3.48 (t,  $J = 5.8$ , 2H,  $-NHCH_2-$ ), 3.71 (s, 2H,  $PhCH_2N-$ ), 3.76 (s, 4H,  $-NCH_2Pyr$ ), 3.86 (s, 4H,  $-NCH_2Pyr$ ), 4.04 (s, 2H,  $PhCH_2N-$ ), 6.99-7.10 (m, 5H, CH (Ar)), 7.42 (d,  $J = 7.5$  Hz, 1H, CH (Ar)), 7.49-7.67 (m, 8H, CH (Ar)), 8.48 (t,  $J = 4.9$  Hz, 4H, CH (Ar));  $\delta_C$  (100 Hz,  $CDCl_3$ ) 41.1, 54.4, 58.5, 60.2, 60.3, 121.6, 121.7, 121.8, 122.4, 123.4, 125.8, 130.6, 136.1, 136.2, 148.7, 158.9, 160.1, 167.3; HRMS (ES+)  $m/z$  calculated for  $C_{35}H_{39}N_9S$  [M+2H] 308.6519. Found 308.6529.

**Preparation of all coordination complexes.** Ligands were dissolved in anhydrous MeOH and zinc (II) triflate (2.0 eq) was added in one portion. The solution was allowed to stir overnight at room temperature. MeOH was then removed *in vacuo* and the resulting solid was washed twice with ether to remove any unreacted scaffold. The solid was then re-dissolved in a small volume of MeOH and filtered through National Scientific Target Syringe Filters (Cellulose Acetate Membrane) 4mm, 0.2  $\mu$ m. Finally, the filtrate was diluted in distilled water and lyophilized to dryness.

## Characterization of Final Ligands 1-7

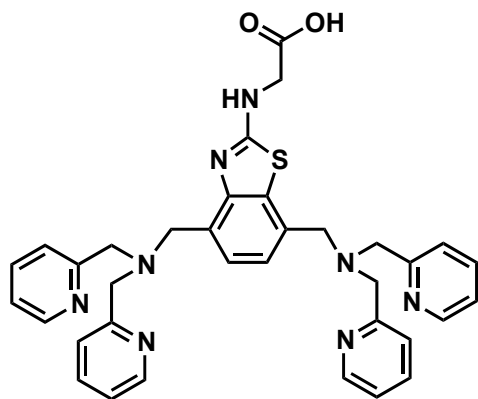

### 2-((4,7-bis((bis(pyridin-2-ylmethyl)amino)methyl)benzo[d]thiazol-2-yl)amino)acetic acid

**(L1).**  $\delta_{\text{H}}$  (400 MHz, MeOD) 3.78 (s, 2H, -NHCH<sub>2</sub>CO<sub>2</sub>H-), 4.21 (s, 2H, -NCH<sub>2</sub>(Ar)), 4.26 (s, 4H, -NCH<sub>2</sub>Pyr), 4.38 (s, 2H, -NCH<sub>2</sub>(Ar)), 4.42 (s, 4H, -NCH<sub>2</sub>Pyr), 7.00 (d,  $J = 7.7$  Hz, 1H, CH(Ar)), 7.12 (d,  $J = 7.8$  Hz, 1H, Ar), 7.55 (t,  $J = 6.9$  Hz, 2H, CH(Pyr)), 7.59 (d,  $J = 7.9$  Hz, 2H, CH(Pyr)), 7.68 (t,  $J = 6.6$  Hz, 2H, CH(Pyr)), 7.80 (d,  $J = 8.3$  Hz, 2H, CH(Pyr)), 8.06 (t,  $J = 8.3$  Hz, 2H, CH(Pyr)), 8.23 (t,  $J = 7.9$  Hz, 2H, CH(Pyr)), 8.66 (d,  $J = 5.2$  Hz, 2H, CH(Pyr)), 8.81 (d,  $J = 5.5$  Hz, 2H, CH(Pyr));  $\delta_{\text{C}}$  (100 Hz, MeOD) 45.2, 56.5, 57.2, 57.5, 59.0, 122.8, 124.4, 124.8, 124.9, 126.3, 127.7, 129.7, 131.0, 141.7, 142.4, 144.1, 144.7, 150.3, 151.8, 153.6, 160.0, 160.4, 171.5; HRMS (ES<sup>+</sup>)  $m/z$  calculated for C<sub>35</sub>H<sub>34</sub>N<sub>8</sub>O<sub>2</sub>S [M+H] 630.2505. Found 630.9350; HRMS (ES<sup>+</sup>)  $m/z$  calcd for C<sub>35</sub>H<sub>34</sub>N<sub>8</sub>O<sub>2</sub>SZn [L1+Zn] 347.0902. Found 347.0906; IR (KBr, cm<sup>-1</sup>) 3516, 3236, 2925, 1683, 1609, 1559, 1486, 1442, 1408, 1229, 1171, 1033, 765, 646, 578, 519.

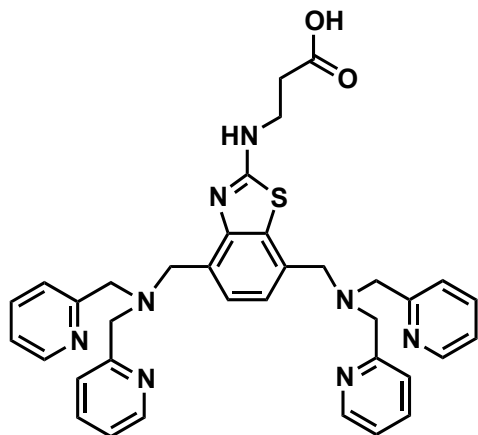

**3-((4,7-bis((bis(pyridin-2-ylmethyl)amino)methyl)benzo[d]thiazol-2-yl)amino)propanoic acid (L2).**  $\delta_{\text{H}}$  (400 MHz, MeOD) 2.83 (t,  $J = 6.7$  Hz, 2H,  $-\text{NHCH}_2\text{CH}_2-$ ), 3.88 (t,  $J = 6.6$  Hz, 2H,  $-\text{CH}_2\text{CH}_2\text{COOH}$ ); 3.91 (s, 2H,  $-\text{NCH}_2(\text{Ar})$ ), 4.19 (s, 4H,  $-\text{NCH}_2\text{Pyr}$ ), 4.50 (s, 4H,  $-\text{NCH}_2\text{Pyr}$ ), 4.64 (s, 2H,  $-\text{NCH}_2(\text{Ar})$ ), 7.05 (d,  $J = 8.3$  Hz, 1H,  $\text{CH}(\text{Ar})$ ), 7.18 (d,  $J = 7.7$  Hz, 1H, Ar), 7.39 (d,  $J = 7.1$  Hz, 4H,  $\text{CH}(\text{Pyr})$ ), 7.49 (t,  $J = 6.4$  Hz, 2H,  $\text{CH}(\text{Pyr})$ ), 7.59 (d,  $J = 8.3$  Hz, 2H,  $\text{CH}(\text{Pyr})$ ), 7.83 (t,  $J = 7.7$  Hz, 2H,  $\text{CH}(\text{Pyr})$ ), 8.02 (t,  $J = 8.3$  Hz, 2H,  $\text{CH}(\text{Pyr})$ ), 8.63 (d,  $J = 5.1$  Hz, 2H,  $\text{CH}(\text{Pyr})$ ), 8.72 (d,  $J = 5.8$  Hz, 2H,  $\text{CH}(\text{Pyr})$ );  $\delta_{\text{C}}$  (100 Hz, MEOD) 37.3, 40.4, 56.6, 57.3, 57.5, 59.0, 77.9, 114.4, 117.3, 122.7, 124.2, 124.7, 126.0, 127.6, 129.4, 131.4, 140.1, 143.0, 143.4, 146.3, 151.2, 154.1, 168.2, 173.7; HRMS (ES+)  $m/z$  calcd for  $\text{C}_{36}\text{H}_{38}\text{N}_8\text{O}_2\text{S}$  [ $\text{M}+2\text{H}$ ] 323.1413. Found 323.1408; HRMS (ES+)  $m/z$  calcd for  $\text{C}_{36}\text{H}_{36}\text{N}_8\text{O}_2\text{SZn}$  [ $\text{L2}+\text{Zn}$ ] 354.0981. Found 354.0973; IR (KBr,  $\text{cm}^{-1}$ ) 3519, 3214, 3019, 2895, 1681, 1611, 1562, 1441, 1384, 1263, 1202, 1032, 842, 802, 765.

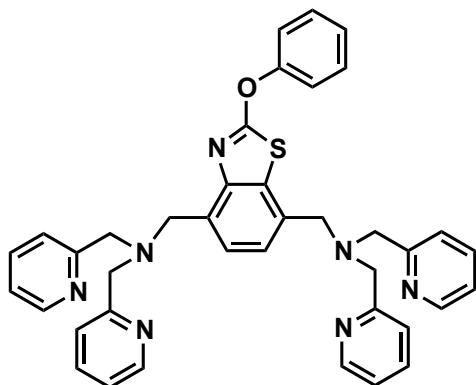

***N,N'***-((2-phenoxybenzo[*d*]thiazole-4,7-diyl)bis(methylene))bis(1-(pyridin-2-yl)-*N*-(pyridin-2-ylmethyl)methanamine) (**L3**).  $\delta_{\text{H}}$  (400 MHz,  $\text{CDCl}_3$ ) 3.64-4.70 (m, 12H,  $\text{PhCH}_2\text{N}$ - and - $\text{NCH}_2\text{Pyr}$ ), 7.09-7.19 (m, 4H, CH (Ar)), 7.21 (d,  $J = 8.0$  Hz, 1H, CH (Ar)), 7.28-7.52 (m, 8H, CH (Ar)), 7.56-7.69 (m, 6H, CH (Ar)), 7.42-7.54 (m, 4H, CH (Ar));  $\delta_{\text{C}}$  (100 MHz, MeOD) 54.4, 57.9, 59.6, 59.8, 120.4, 122.0, 122.3, 123.1, 124.0, 124.2, 126.0, 127.0, 128.0, 130.0, 130.4, 131.5, 136.8, 137.0, 147.7, 147.9, 148.5, 150.6, 155.0, 158.0, 159.0, 172.9; HRMS (ES+)  $m/z$  calcd for  $\text{C}_{39}\text{H}_{37}\text{N}_7\text{OS}$  [ $\text{M}+2\text{H}$ ] 325.6384. Found 325.6379; HRMS (ES+)  $m/z$  calcd for  $\text{C}_{39}\text{H}_{35}\text{N}_7\text{OSZn}$  [ $\text{L3}+\text{Zn}$ ] 356.5952. Found 356.5941; IR (KBr,  $\text{cm}^{-1}$ ) 3474, 2920, 2359, 1610, 1576, 1518, 1484, 1445, 1384, 1252, 1173, 1032, 825, 768.

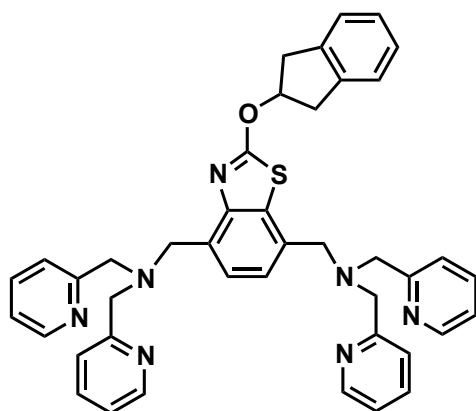

***N,N'***-((2-((2,3-dihydro-1*H*-inden-2-yl)oxy)benzo[*d*]thiazole-4,7-diyl)bis(methylene))bis(1-(pyridin-2-yl)-*N*-(pyridin-2-ylmethyl)methanamine) (**L4**).  $\delta_{\text{H}}$  (400 MHz,  $\text{CDCl}_3$ ) 3.29 (dd,  $J =$

17.3 and 3.3 Hz, 2H, >CHCH<sub>2</sub>), 3.45 (dd, *J* = 18 and 5.2 Hz, 2H, >CHCH<sub>2</sub>-), 3.76 (s, 4H, -NCH<sub>2</sub>Pyr), 3.77 (s, 2H, PhCH<sub>2</sub>N-), 3.90 (s, 4H, -NCH<sub>2</sub>Pyr), 4.14 (s, 2H, PhCH<sub>2</sub>N-), 5.88-5.94 (m, 1H, -OCH<), 7.05-7.16 (m, 5H, CH(Ar)), 7.20-7.30 (m, 4H, CH(Ar)), 7.49 (d, *J* = 7.2, 1H, CH(Ar)), 7.55-7.70 (m, 8H, CH(Ar)), 8.48 (d, *J* = 5.2 Hz, 4H, CH(Ar)); δ<sub>C</sub> (100 MHz, CDCl<sub>3</sub>) 39.5, 42.5, 58.4, 60.2, 60.3, 82.3, 121.6, 121.9, 122.4, 123.5, 123.8, 124.6, 124.8, 126.4, 126.7, 136.2, 136.3, 140.3, 148.7, 148.8, 158.7, 160.1, 172.3; HRMS (ES+) *m/z* calcd for C<sub>42</sub>H<sub>41</sub>N<sub>7</sub>OS [M+2H] 345.6541. Found 346.6548; HRMS (ES+) *m/z* calcd for C<sub>42</sub>H<sub>39</sub>N<sub>7</sub>OSZn [L4+Zn] 376.6108. Found 376.6112; IR (KBr, cm<sup>-1</sup>) 3475, 2923, 1610, 1575, 1485, 1445, 1250, 1173, 1032.

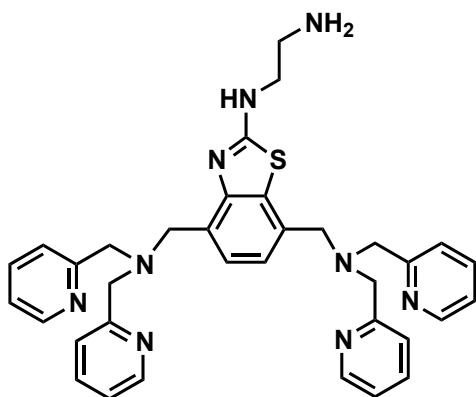

**N<sup>1</sup>-(4,7-bis((bis(pyridin-2-ylmethyl)amino)methyl)benzo[d]thiazol-2-yl)ethane-1,2-diamine (L5).** δ<sub>H</sub> (400 MHz, CDCl<sub>3</sub>) 2.01 (s, 2H, -NH<sub>2</sub>), 2.98 (t, *J* = 5.8 Hz, 2H, -CH<sub>2</sub>NH<sub>2</sub>), 3.48 (t, *J* = 5.8, 2H, -NHCH<sub>2</sub>-), 3.71 (s, 2H, PhCH<sub>2</sub>N-), 3.76 (s, 4H, -NCH<sub>2</sub>Pyr), 3.86 (s, 4H, -NCH<sub>2</sub>Pyr), 4.04 (s, 2H, PhCH<sub>2</sub>N-), 6.99-7.10 (m, 5H, CH (Ar)), 7.42 (d, *J* = 7.5 Hz, 1H, CH (Ar)), 7.49-7.67 (m, 8H, CH (Ar)), 8.48 (t, *J* = 4.9 Hz, 4H, CH (Ar)); δ<sub>C</sub> (100 MHz, CDCl<sub>3</sub>) 41.1, 54.4, 58.5, 60.2, 60.3, 121.6, 121.7, 121.8, 122.4, 123.4, 125.8, 130.6, 136.1, 136.2, 148.7, 158.9, 160.1, 167.3; HRMS (ES+) *m/z* calculated for C<sub>35</sub>H<sub>39</sub>N<sub>9</sub>S [M+2H] 308.6519. Found 308.6529; HRMS

(ES+)  $m/z$  calcd for  $C_{35}H_{37}N_9SZn$  [L5+Zn] 339.6068. Found 339.6083; IR (KBr,  $cm^{-1}$ ) 3506, 2923, 2360, 1609, 1560, 1484, 1444, 1384, 1251, 1171, 1033, 823, 766.

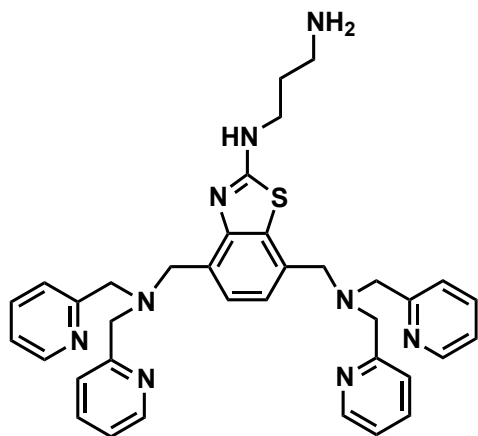

***N*<sup>1</sup>-(4,7-bis((bis(pyridin-2-ylmethyl)amino)methyl)benzo[*d*]thiazol-2-yl)propane-1,3-**

**diamine (L6).**  $\delta_H$  (400 MHz,  $CDCl_3$ ) 1.81 (p,  $J = 7.4$  Hz, 2H,  $-CH_2CH_2CH_2$ ) 1.98 (s, 2H,  $-NH_2$ ), 2.88 (t,  $J = 6.1$  Hz, 2H,  $-CH_2NH_2$ ), 3.54 (t,  $J = 6.1$ , 2H,  $-NHCH_2-$ ), 3.74 (s, 2H,  $PhCH_2N-$ ), 3.79 (s, 4H,  $-NCH_2Pyr$ ), 3.86 (s, 4H,  $-NCH_2Pyr$ ), 4.04 (s, 2H,  $PhCH_2N-$ ), 6.34 (s, 1H, NH), 6.99-7.13 (m, 5H, CH (Ar)), 7.44 (d,  $J = 7.7$  Hz, 1H, CH (Ar)), 7.51-7.69 (m, 8H, CH (Ar)), 8.47 (t,  $J = 5.9$  Hz, 4H, CH (Ar));  $\delta_C$  (100 MHz,  $CDCl_3$ ) 32.2, 39.9, 54.5, 58.5, 60.2, 121.6, 121.7, 121.8, 122.5, 123.4, 125.8, 130.6, 136.1, 136.2, 148.7, 148.8, 159.0, 160.1, 163.5, 173.5; HRMS (ES+)  $m/z$  calcd for  $C_{36}H_{41}N_9S$  [M+2H] 315.6598. Found 315.6601; HRMS (ES+)  $m/z$  calcd for  $C_{36}H_{39}N_9SZn$  [L6+Zn] 346.6164. Found 346.6168; IR (KBr,  $cm^{-1}$ ) 3519, 3204, 2923, 1608, 1561, 1485, 1444, 1411, 1383, 1261, 1169, 1101, 1032, 821, 769.



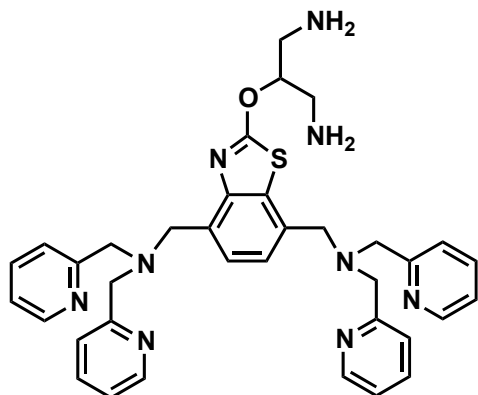

**2-((4,7-bis((bis(pyridin-2-ylmethyl)amino)methyl)benzo[d]thiazol-2-yl)oxy)propane-1,3-diamine (L7).**  $\delta_{\text{H}}$  (400 MHz,  $\text{CDCl}_3$ ) 2.96-3.44 (m, 4H,  $-\text{CH}_2\text{NH}_2$ ) 3.53-4.16 (m, 12H,  $-\text{NCH}_2\text{Pyr}$  and  $\text{PhCH}_2\text{N}-$ ), 4.67 (m, 1H,  $-\text{OCH}_2(\text{CH}_2\text{NH}_2)$ ) 6.92 (d,  $J = 8.9$  Hz, 1H, CH (Ar)), 7.03-7.19 (m, 3H, CH (Ar)), 7.20-7.29 (m, 4H, CH (Ar)), 7.60-7.71 (m, 4H, CH (Ar)), 7.79 (t,  $J = 8.1$  Hz, 2H, CH (Ar)), 8.51 (d,  $J = 5.7$  Hz, 2H, CH (Ar)), 8.74 (s, 2H, CH (Ar)), 9.79 (s, 2H,  $-\text{NH}_2$ );  $\delta_{\text{C}}$  (100 MHz,  $\text{CDCl}_3$ ) 44.2, 54.7, 58.5, 59.1, 59.7, 59.8, 71.2, 121.6, 122.0, 122.3, 123.3, 123.8, 126.7, 129.3, 129.4, 130.4, 131.9, 136.9, 147.7, 147.8, 151.7, 158.3, 159.4, 167.9; HRMS (ES+)  $m/z$  calcd for  $\text{C}_{36}\text{H}_{41}\text{N}_9\text{OS}$  [ $\text{M}+2\text{H}$ ] 323.6572. Found 323.6585; HRMS (ES+)  $m/z$  calcd for  $\text{C}_{36}\text{H}_{39}\text{N}_9\text{OSZn}$  [ $\text{L7}+\text{Zn}$ ] 354.6139. Found 354.6146; IR (KBr,  $\text{cm}^{-1}$ ) 3483, 2923, 1609, 1560, 1443, 1384, 1262, 1172, 1033.

## Compound ii

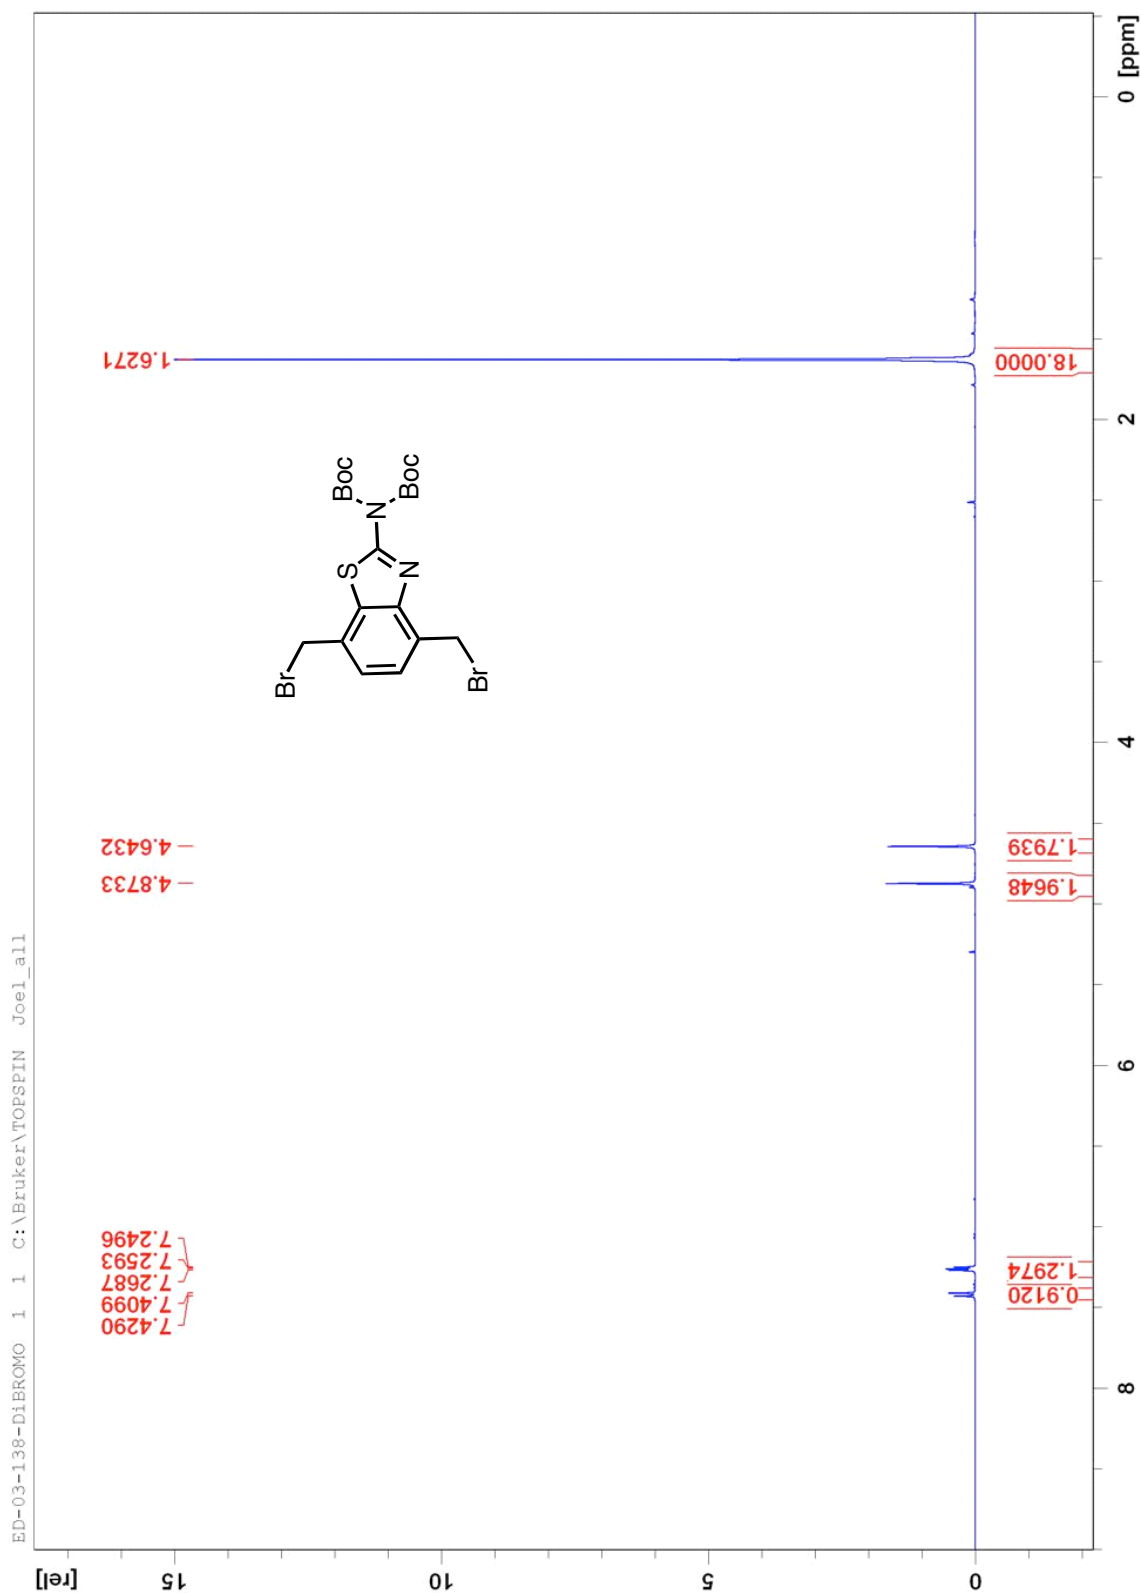

**3-((4,7-bis((bis(pyridin-2-ylmethyl)amino)methyl)benzo[d]thiazol-2-yl)amino)propanoic acid (L2).**

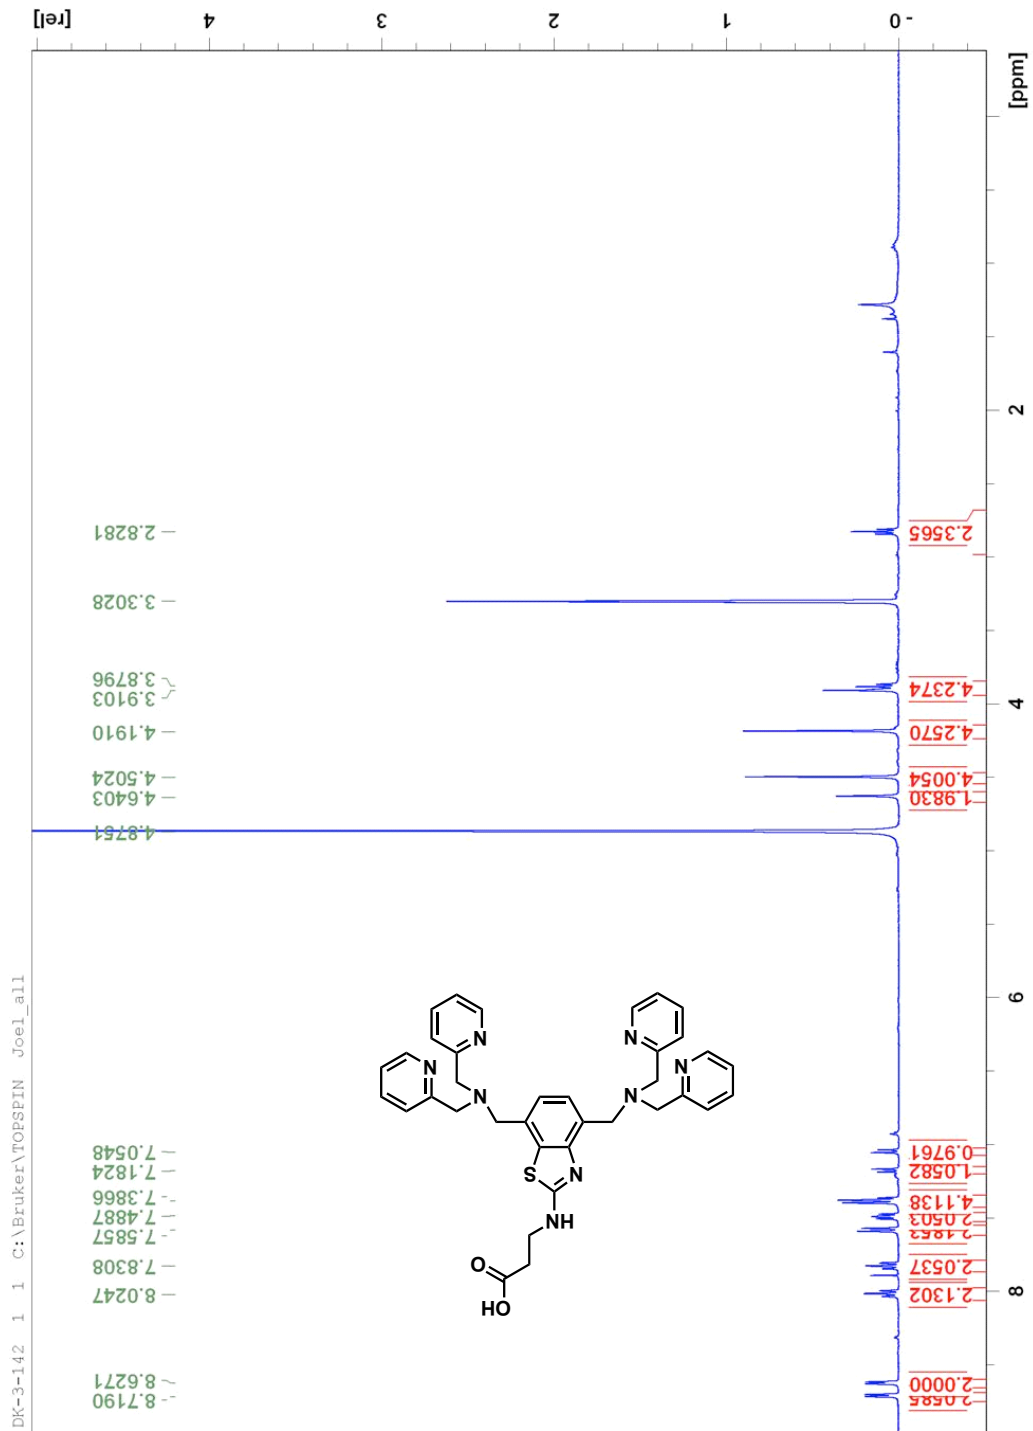

L2

Breeze

Project Name: GunningP  
Reported by User: PatrickGunning

### SAMPLE INFORMATION

|                   |               |                  |                       |
|-------------------|---------------|------------------|-----------------------|
| Sample Name:      | JD-9-007      | Acquired By:     | PatrickGunning        |
| Sample Type:      | Unknown       | Date Acquired:   | 3/17/2012 12:13:41 PM |
| Vial:             | 59            | Acq. Method:     | Anal_MeOH_Joel2_254nm |
| Injection #:      | 1             | Date Processed:  | 3/21/2012 9:08:02 AM  |
| Injection Volume: | 50.00 ul      | Channel Name:    | 2487Channel 1         |
| Run Time:         | 25.00 Minutes | Sample Set Name: | JOEL_HPLC_SCAFFOLDS   |

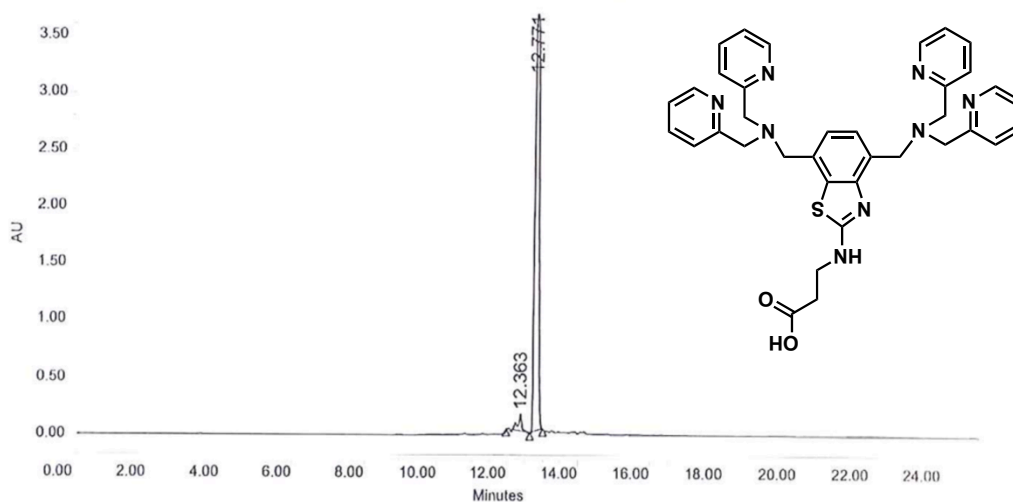

|   | RT (min) | Area (V*sec) | % Area | Height (V) | % Height |
|---|----------|--------------|--------|------------|----------|
| 1 | 12.363   | 1385842      | 4.33   | 153998     | 4.02     |
| 2 | 12.771   | 30584995     | 95.67  | 3676041    | 95.98    |

**3-((4,7-bis((bis(pyridin-2-ylmethyl)amino)methyl)benzo[d]thiazol-2-yl)amino)propanoic acid (L2)**

Project Name: GunningP  
Reported by User: PatrickGunning

L2

Breeze

### SAMPLE INFORMATION

|                   |               |                  |                       |
|-------------------|---------------|------------------|-----------------------|
| Sample Name:      | JD-9-007      | Acquired By:     | PatrickGunning        |
| Sample Type:      | Unknown       | Date Acquired:   | 3/17/2012 11:34:04 AM |
| Vial:             | 59            | Acq. Method:     | Anal_MeOH_Joel_254nm  |
| Injection #:      | 1             | Date Processed:  | 3/21/2012 9:08:19 AM  |
| Injection Volume: | 50.00 ul      | Channel Name:    | 2487Channel 1         |
| Run Time:         | 25.00 Minutes | Sample Set Name: | JOEL_HPLC_SCAFFOLDS   |

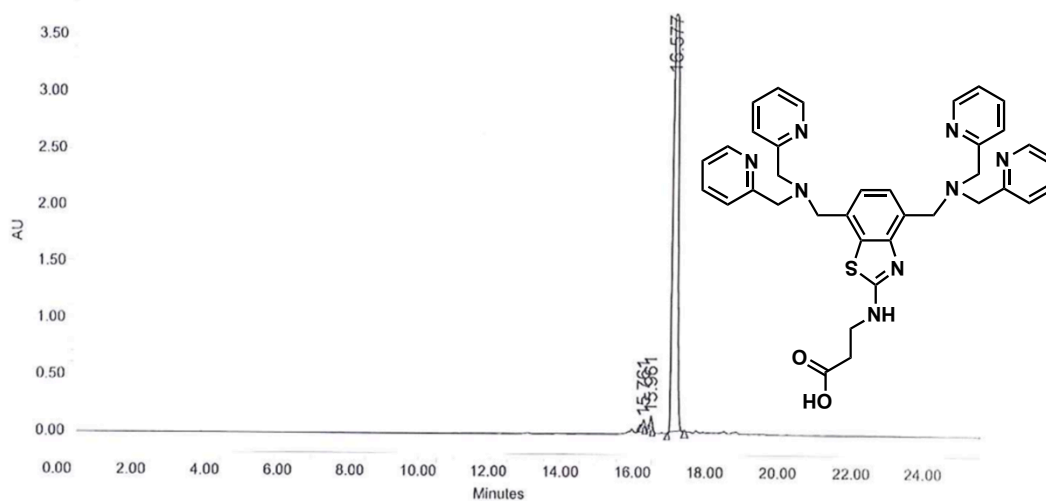

|   | RT (min) | Area (V*sec) | % Area | Height (V) | % Height |
|---|----------|--------------|--------|------------|----------|
| 1 | 15.761   | 236261       | 0.61   | 58824      | 1.53     |
| 2 | 15.961   | 360788       | 0.94   | 96805      | 2.51     |
| 3 | 16.577   | 37851267     | 98.45  | 3700154    | 95.96    |

**3-((4,7-bis((bis(pyridin-2-ylmethyl)amino)methyl)benzo[d]thiazol-2-yl)amino)propanoic acid (L2)**

**N,N'-((2-phenoxybenzo[d]thiazole-4,7-diyl)bis(methylene))bis(1-(pyridin-2-yl)-N-(pyridin-2-ylmethyl)methanamine) (L3).**

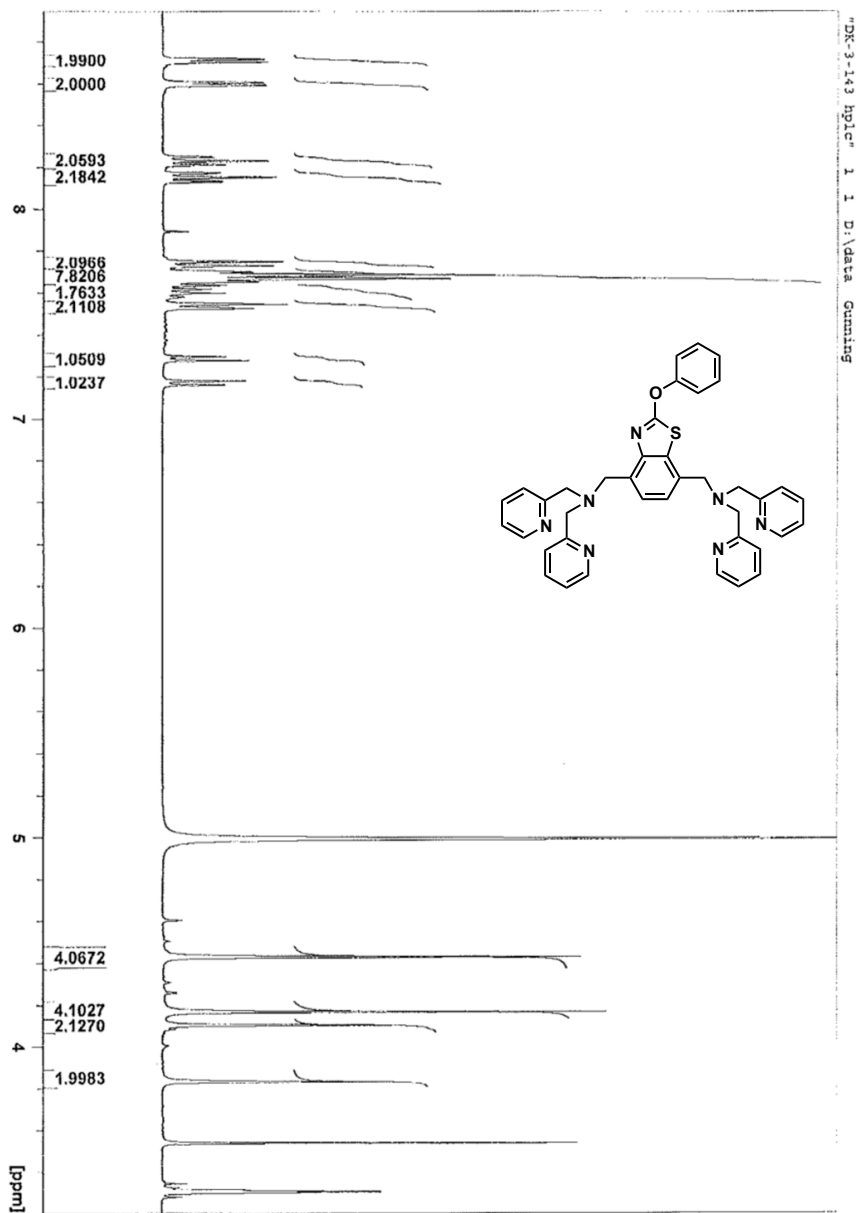

L3

Project Name: GunningP  
Reported by User: PatrickGunning

Breeze

### SAMPLE INFORMATION

|                   |               |                  |                       |
|-------------------|---------------|------------------|-----------------------|
| Sample Name:      | JD-7-024      | Acquired By:     | PatrickGunning        |
| Sample Type:      | Unknown       | Date Acquired:   | 3/20/2012 10:15:34 AM |
| Vial:             | 64            | Acq. Method:     | Anal_MeOH_Joel_254nm  |
| Injection #:      | 1             | Date Processed:  | 4/16/2012 12:06:10 PM |
| Injection Volume: | 50.00 ul      | Channel Name:    | 2487Channel 1         |
| Run Time:         | 25.00 Minutes | Sample Set Name: | JOEL_HPLC_SCAFFOLDS   |

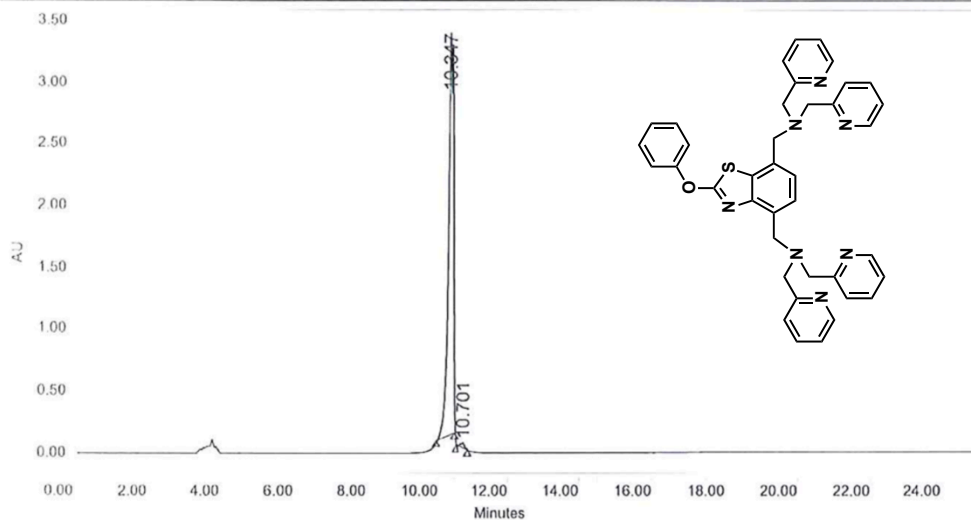

|   | RT (min) | Area (V*sec) | % Area | Height (V) | % Height |
|---|----------|--------------|--------|------------|----------|
| 1 | 10.347   | 32275682     | 98.95  | 3267270    | 98.68    |
| 2 | 10.701   | 341048       | 1.05   | 43701      | 1.32     |

**N,N'-((2-phenoxybenzo[d]thiazole-4,7-diyl)bis(methylene))bis(1-(pyridin-2-yl)-N-(pyridin-2-ylmethyl)methanamine) (L3).**

Project Name: GunningP  
Reported by User: PatrickGunning

LB

'Breeze

### SAMPLE INFORMATION

|                   |               |                  |                       |
|-------------------|---------------|------------------|-----------------------|
| Sample Name:      | JD-7-024      | Acquired By:     | PatrickGunning        |
| Sample Type:      | Unknown       | Date Acquired:   | 3/20/2012 10:55:14 AM |
| Vial:             | 64            | Acq. Method:     | Anal_MeOH_Joel2_254nm |
| Injection #:      | 1             | Date Processed:  | 4/16/2012 10:02:19 AM |
| Injection Volume: | 50.00 ul      | Channel Name:    | 2487Channel 1         |
| Run Time:         | 25.00 Minutes | Sample Set Name: | JOEL_HPLC_SCAFFOLDS   |

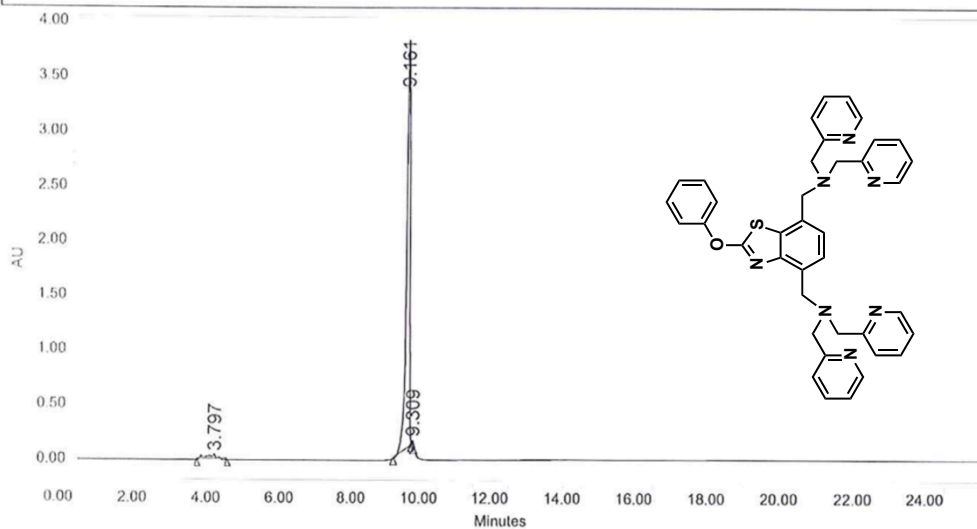

|   | RT (min) | Area (V*sec) | % Area | Height (V) | % Height |
|---|----------|--------------|--------|------------|----------|
| 1 | 3.797    | 990040       | 3.98   | 48088      | 1.26     |
| 2 | 9.161    | 23747833     | 95.51  | 3735318    | 97.50    |
| 3 | 9.309    | 127377       | 0.51   | 47615      | 1.24     |

**N,N'-((2-phenoxybenzo[d]thiazole-4,7-diyl)bis(methylene))bis(1-(pyridin-2-yl)-N-(pyridin-2-ylmethyl)methanamine) (L3).**



**N,N'-((2-((2,3-dihydro-1H-inden-2-yl)oxy)benzo[d]thiazole-4,7-diyl)bis(methylene))bis(1-(pyridin-2-yl)-N-(pyridin-2-ylmethyl)methanamine) (L4)**

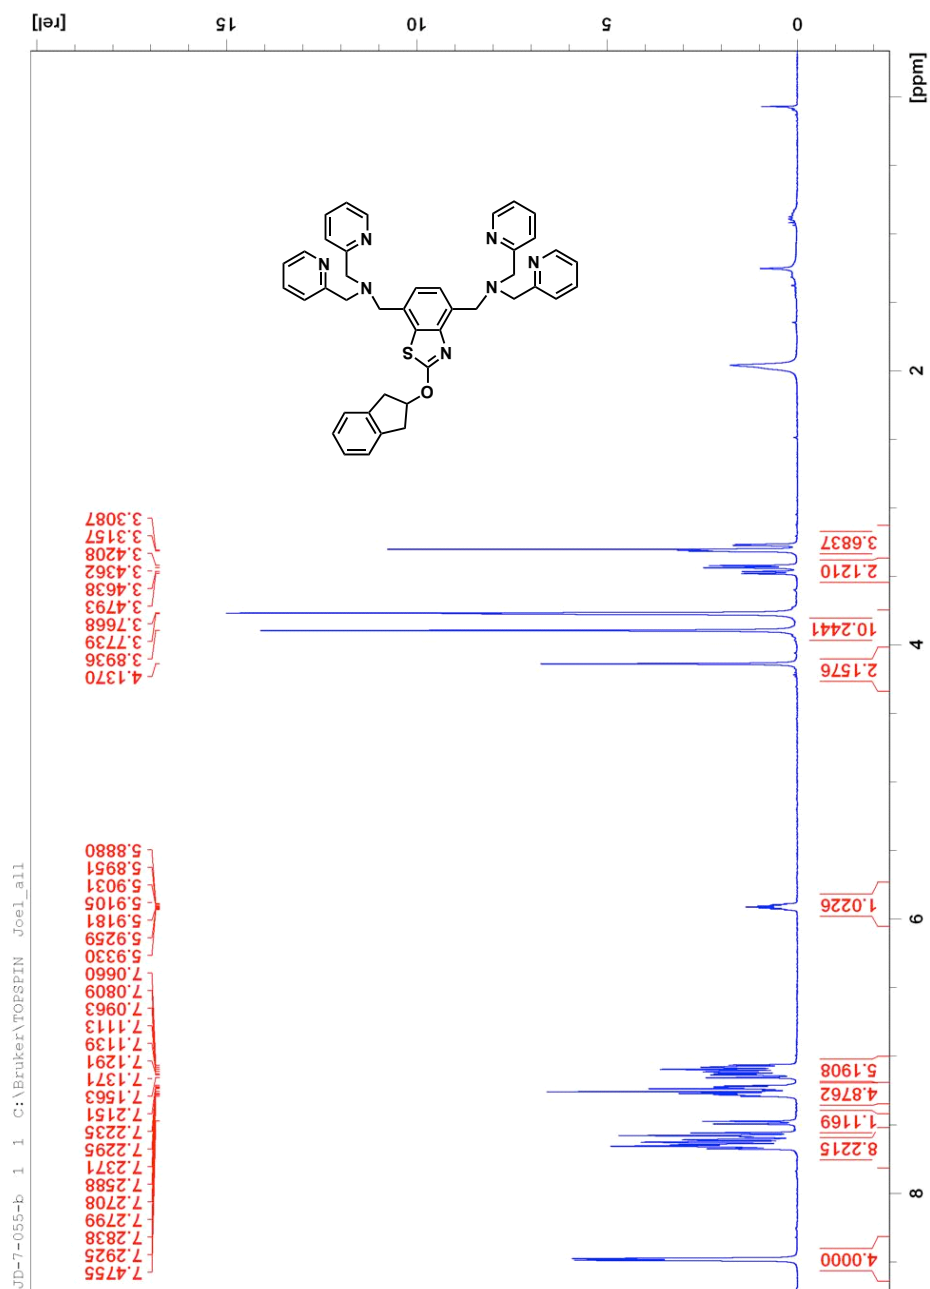

**N1-(4,7-bis((bis(pyridin-2-ylmethyl)amino)methyl)benzo[d]thiazol-2-yl)ethane-1,2-diamine  
(L5).**

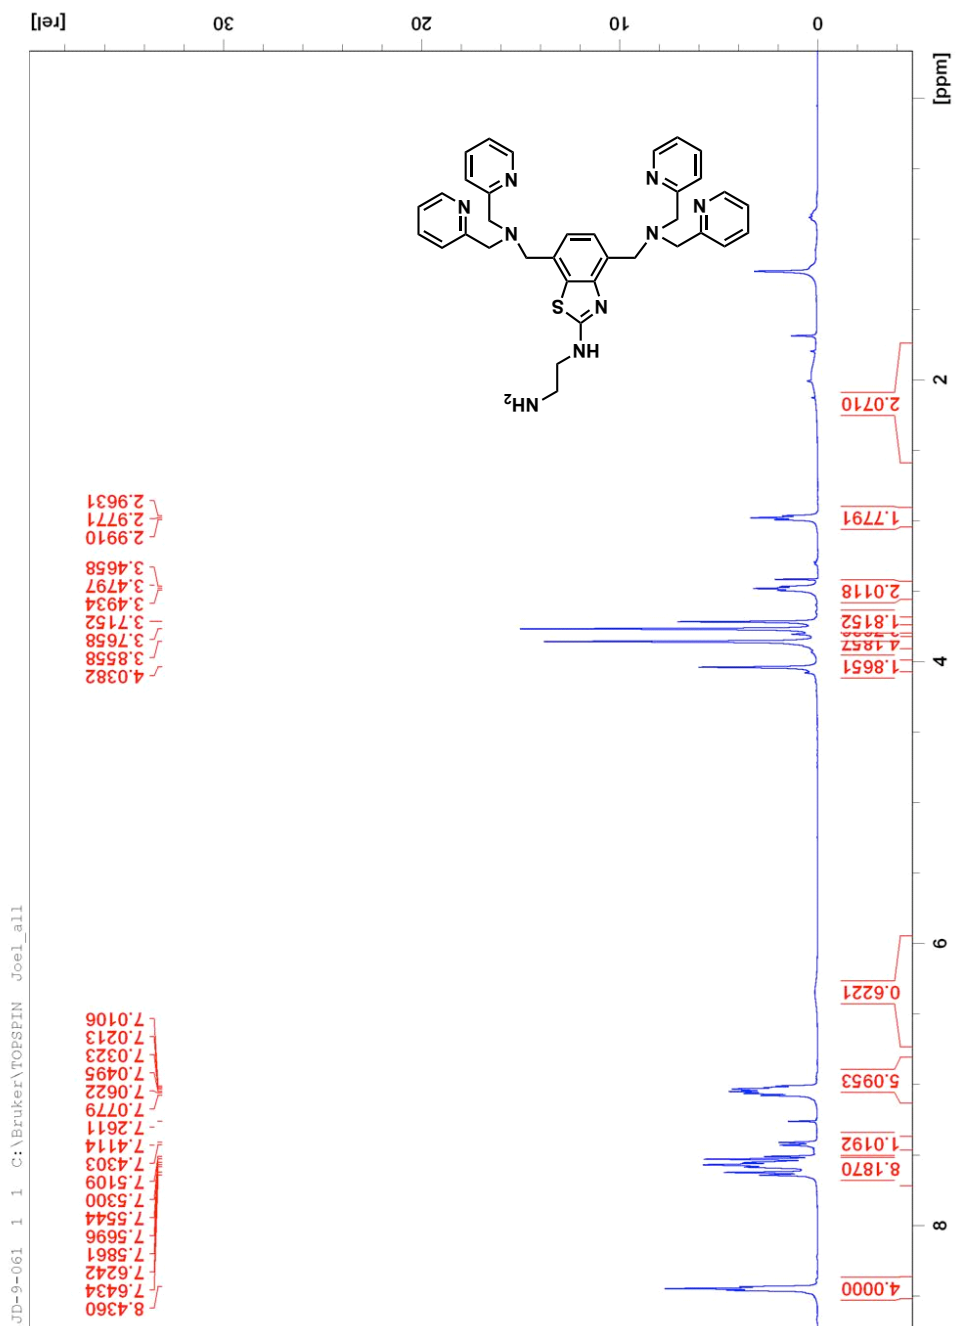

L15

Project Name: GunningP  
Reported by User: PatrickGunning

Breeze

### SAMPLE INFORMATION

|                   |               |                  |                       |
|-------------------|---------------|------------------|-----------------------|
| Sample Name:      | JD-9-061      | Acquired By:     | PatrickGunning        |
| Sample Type:      | Unknown       | Date Acquired:   | 3/17/2012 12:53:22 PM |
| Vial:             | 60            | Acq. Method:     | Anal_MeOH_JoeI_254nm  |
| Injection #:      | 1             | Date Processed:  | 3/21/2012 9:07:39 AM  |
| Injection Volume: | 50.00 ul      | Channel Name:    | 2487Channel 1         |
| Run Time:         | 25.00 Minutes | Sample Set Name: | JOEL_HPLC_SCAFFOLDS   |

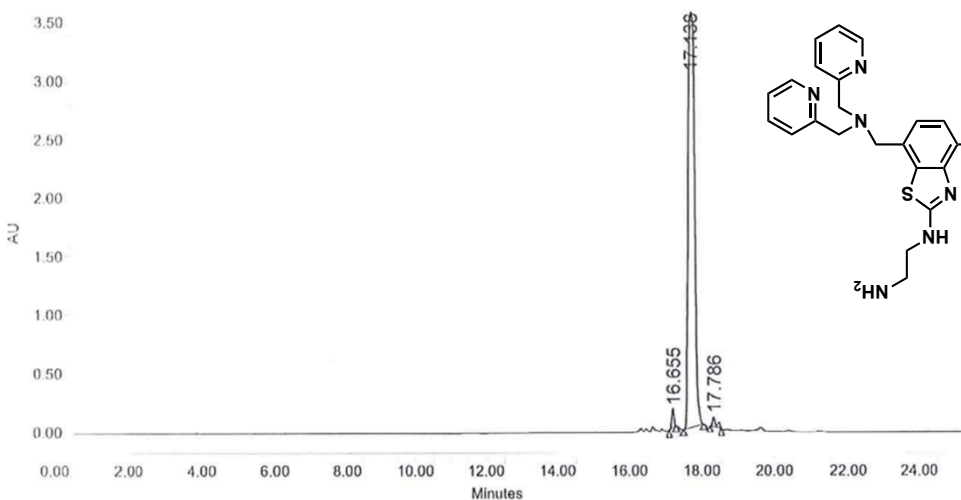

|   | RT (min) | Area (V*sec) | % Area | Height (V) | % Height |
|---|----------|--------------|--------|------------|----------|
| 1 | 16.655   | 759182       | 1.63   | 173765     | 4.55     |
| 2 | 17.138   | 45142128     | 96.90  | 3559459    | 93.22    |
| 3 | 17.786   | 684533       | 1.47   | 85286      | 2.23     |

**N1-(4,7-bis((bis(pyridin-2-ylmethyl)amino)methyl)benzo[d]thiazol-2-yl)ethane-1,2-diamine (L5).**

Project Name: GunningP  
Reported by User: PatrickGunning

L5  
Breeze

### SAMPLE INFORMATION

|                   |               |                  |                       |
|-------------------|---------------|------------------|-----------------------|
| Sample Name:      | JD-9-061      | Acquired By:     | PatrickGunning        |
| Sample Type:      | Unknown       | Date Acquired:   | 3/17/2012 1:32:59 PM  |
| Vial:             | 60            | Acq. Method:     | Anal_MeOH_Joel2_254nm |
| Injection #:      | 1             | Date Processed:  | 3/21/2012 9:07:11 AM  |
| Injection Volume: | 50.00 ul      | Channel Name:    | 2487Channel 1         |
| Run Time:         | 25.00 Minutes | Sample Set Name: | JOEL_HPLC_SCAFFOLDS   |

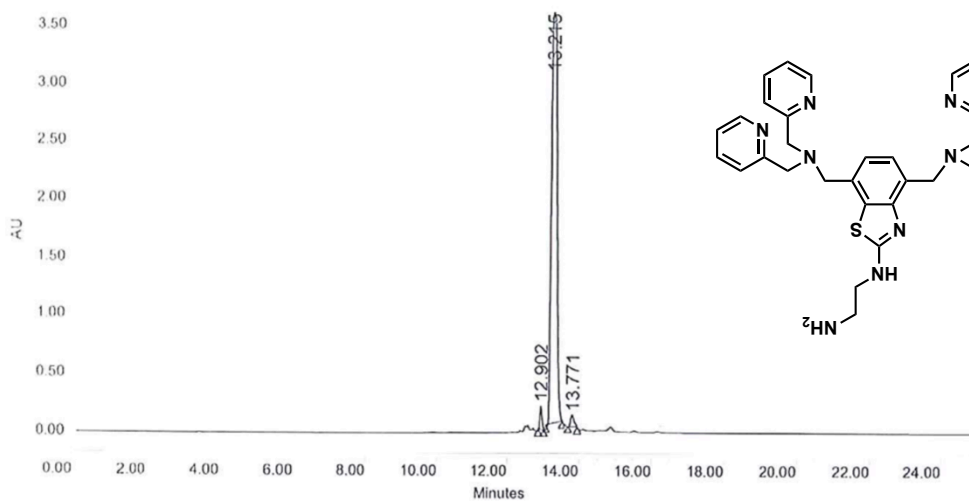

|   | RT (min) | Area (V*sec) | % Area | Height (V) | % Height |
|---|----------|--------------|--------|------------|----------|
| 1 | 12.902   | 821405       | 2.03   | 200704     | 5.18     |
| 2 | 13.215   | 38879013     | 96.08  | 3563562    | 92.04    |
| 3 | 13.771   | 765272       | 1.89   | 107617     | 2.78     |

**N1-(4,7-bis((bis(pyridin-2-ylmethyl)amino)methyl)benzo[d]thiazol-2-yl)ethane-1,2-diamine (L5).**

LA

Breeze

Project Name: GunningP  
Reported by User: PatrickGunning

| SAMPLE INFORMATION |               |                  |                       |
|--------------------|---------------|------------------|-----------------------|
| Sample Name:       | jd-7-055      | Acquired By:     | PatrickGunning        |
| Sample Type:       | Unknown       | Date Acquired:   | 3/20/2012 8:03:36 PM  |
| Vial:              | 71            | Acq. Method:     | Anal_MeOH_Joel2_254nm |
| Injection #:       | 1             | Date Processed:  | 3/21/2012 8:39:44 AM  |
| Injection Volume:  | 50.00 ul      | Channel Name:    | 2487Channel 1         |
| Run Time:          | 25.00 Minutes | Sample Set Name: | JOEL_HPLC_SCAFFOLDS   |

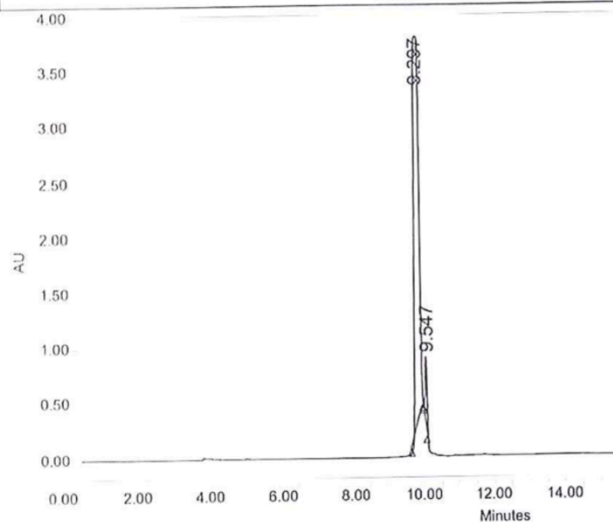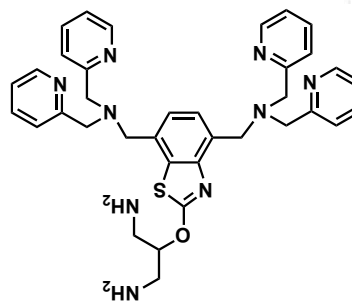

**2-((4,7-bis((bis(pyridin-2-ylmethyl)amino)methyl)benzo[d]thiazol-2-yl)oxy)propane-1,3-diamine (L7).**

|   | RT (min) | Area (V*sec) | % Area | Height (V) | % Height |
|---|----------|--------------|--------|------------|----------|
| 1 | 9.297    | 34975277     | 95.07  | 3569366    | 85.75    |
| 2 | 9.547    | 1813430      | 4.93   | 593326     | 14.25    |
